# Supplementary material
Source: publisher site journal article supplement (https://www.dovepress.com/get_supplementary_file.php?f=230244.docx)
Supplement: Supplementary file 1 [file get_supplementary_file.php]

**Supplementary Information**

**Characterization and anti-cancerous effect of *Putranjiva roxburghii* seed extract mediated silver nanoparticles on human colon (HCT-116), pancreatic (PANC-1) and breast (MDA-MB 231) cancer cell lines: A comparative study**

**Acharya Balkrishna, Vinay Kumar Sharma, Subrata Das, Nayan Mishra, Laxmi Bisht, Alpana Joshi, Niti Sharma***

**Patanjali Research Foundation, Haridwar, Uttarakhand 249405, India**

***Corresponding author. E mail:** nitivinay@yahoo.co.in**Tel. 91-1334-242418**

**

**

**Supplementary Figure 1**: DNA ladder on agarose gel electrophoresis. Lane M: 100 bp ladder, L1: MDA-MB 231 control, L2: MDA-MB 231 treated, L3: HCT 116 control, L4: HCT 116 treated, L5: PANC-1 control, L6: PANC-1 treated.
